# Supplementary material for: Effects of Substrate Mechanics on Contractility of Cardiomyocytes Generated from Human Pluripotent Stem Cells
Source: PubMed Central journal article supplement (PMC3357596; doi:10.1155/2012/508294), 2012-05-09

**A**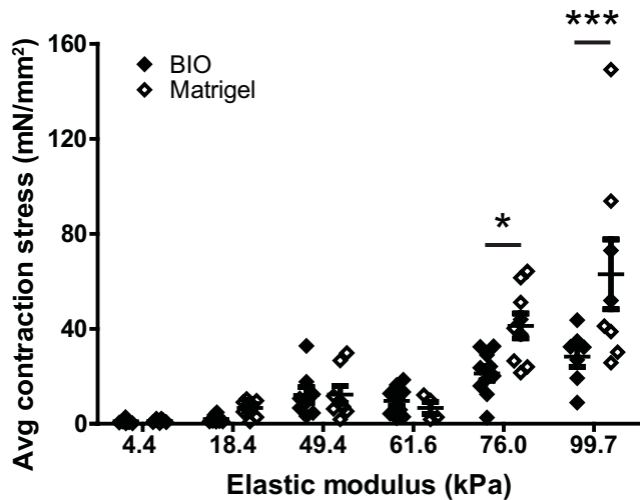**B**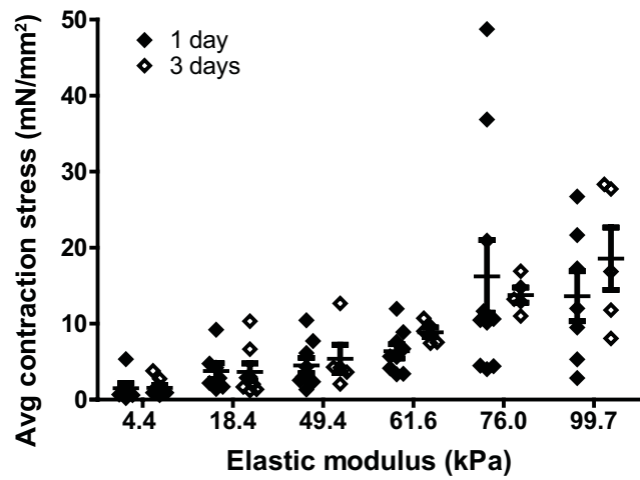

Supplement: 508294.f1.pdf [file 508294.f1.pdf]
