# Supplementary material for: Effects of Substrate Mechanics on Contractility of Cardiomyocytes Generated from Human Pluripotent Stem Cells
Source: PubMed Central journal article supplement (PMC3357596; doi:10.1155/2012/508294), 2012-05-09
Supplement: 508294.f12.pdf [file 508294.f12.pdf]

**Supplementary Table 1.** Parameter values input to the LIBTRC templet file and used to obtain contraction stress data. For parameters not listed in this table, the default values were used.

| <b>Parameter</b> | <b>Description</b>                              | <b>Value</b>           | <b>Units<br/>(if applicable)</b> | <b>Source</b>                                                      |
|------------------|-------------------------------------------------|------------------------|----------------------------------|--------------------------------------------------------------------|
| <b>YMODU</b>     | Elastic modulus of substrate                    | 4.400E+03 to 9.970E+04 | Pa                               | Tensile testing of PA hydrogels (see Figure 1)                     |
| <b>POSRA</b>     | Poisson's ratio of substrate                    | 3.000E-01              |                                  | Assumed value for all PA compositions                              |
| <b>TFILM</b>     | Thickness of substrate                          | 1.000E-03              | m                                | Thickness of PDMS spacers used to generate PA hydrogels            |
| <b>BDIAM</b>     | Diameter of fluorescent beads                   | 7.200E-07              | m                                | Label on fluorescent bead packaging                                |
| <b>ZBAVE</b>     | Average depth of beads below surface of surface | -2.000E-06             | m                                | Z-stack of a typical substrate using Nikon A1R confocal microscope |
| <b>NPIXX</b>     | X dimension of image                            | 5.120E+02              | pixels                           | Image property                                                     |
| <b>NPIXY</b>     | Y dimension of image                            | 5.120E+02              | pixels                           | Image property                                                     |
| <b>NBITS</b>     | Number of bits/pixel of image                   | 1.600E+01              |                                  | Image property                                                     |
| <b>ZDEEP</b>     | Depth of optical section                        | 3.010E-06              | m                                | Obtained from Nikon NIS-Elements software                          |
| <b>MPPX</b>      | Width of pixel in the X direction               | 2.100E-07 to 3.100E-07 | m                                | Depends on additional zoom of data set                             |
| <b>MPPY</b>      | Height of pixel in the Y direction              | 2.100E-07 to 3.100E-07 | m                                | Depends on additional zoom of data set                             |

Reference: Dembo, M. (2010) The LIBTRC User's Guide for Version 2.4.
