# Supplementary material for: Effects of Substrate Mechanics on Contractility of Cardiomyocytes Generated from Human Pluripotent Stem Cells
Source: Hindawi journal article supplement (doi:10.1155/2012/508294), 2012-01-01

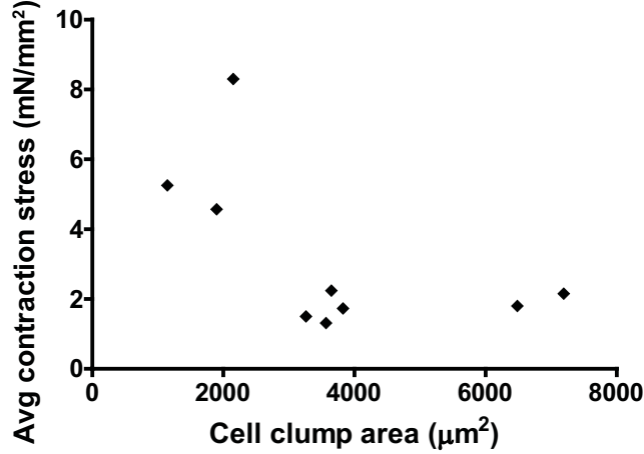

Supplement: f2 [file 508294.f2.pdf]
